# Supplementary material for: Crystallization and disorder of the polytypic α1 and α2 polymorphs of piroxicam
Source: Royal Society of Chemistry journal article supplement (doi:10.1039/c5ce00050e), 2015-01-01
Supplement: c5ce00050e2.pdf [file c5ce00050e2.pdf]

# Crystallization and disorder of the polytypic $\alpha_1$ and $\alpha_2$ polymorphs of piroxicam

Pratik P. Upadhyay and Andrew D. Bond

## S1. Details of the DFT-D energy minimisation

Minimisations were performed as described in the Experimental section, in three successive steps:

- (1) Allowing only H atoms to move.
- (2) Allowing all atoms to move within a constrained unit cell.
- (3) Allowing all atoms to move, with optimisation of the unit-cell parameters.

In all three cases, the specified space group symmetry was imposed. Minimisation steps (2) and (3) produced only very small geometrical deviations compared to the result of step (1), as expected for high-quality single-crystal structures. The log files from *CASTEP* are provided within the ESI as a record of the input parameters, convergence conditions, final forces on atoms, *etc.* The minimised structures from step (3) are also compiled in CIF format in the file *minimised.cif*.

## S2. Details of the *PIXEL* calculations

From the DFT-D minimised structures produced in step (3), intermolecular interaction energies were calculated using the *PIXEL* method (Gavezzotti, 2011). A summary of the interaction energies is given in the following tables, partitioned into interactions between molecules within the hydrogen-bonded sheets, molecules in adjacent sheets where the pyridyl groups interact, and molecules in adjacent sheets where the benzothiazine groups interact. The tables and corresponding energy-vector diagrams shown in the main paper are produced from the *PIXEL* output files using the *processPIXEL* program. Electronic versions of these files are included with the ESI.

$\alpha_1$ : BIYSEH02 (DFT-D optimised),  $Pbc2_1$  ( $a = 17.2547$ ,  $b = 11.5746$ ,  $c = 6.7892$  Å)

Estimated totals (kJ mol<sup>-1</sup>) from 12 most stabilising interactions: in-layer -53.7; pyridyl -53.4; benzo -38.9 (factor ½ applied to deal with “double counting”)

|    |     | Mol 1 | Mol 2 | Mol 2 Operator  | Distance | Coulomb | Polarisation | Dispersion | Repulsion | Total |          |
|----|-----|-------|-------|-----------------|----------|---------|--------------|------------|-----------|-------|----------|
| A0 | A63 | 1     | 1     | x,0.5-y,-0.5+z  | 4.956    | -11.1   | -5.8         | -63.1      | 38.9      | -41.0 | In-layer |
| A0 | A3  | 1     | 1     | x,0.5-y,0.5+z   | 4.956    | -11.1   | -5.8         | -63.1      | 38.9      | -41.0 | In-layer |
| A0 | A45 | 1     | 1     | 2-x,1-y,-0.5+z  | 8.910    | -11.1   | -5.8         | -32.8      | 21.5      | -28.2 | Pyridyl  |
| A0 | A46 | 1     | 1     | 2-x,1-y,0.5+z   | 8.910    | -11.1   | -5.8         | -32.8      | 21.5      | -28.2 | Pyridyl  |
| A0 | A98 | 1     | 1     | 2-x,0.5+y,z     | 9.829    | -10.3   | -10.0        | -35.5      | 30.7      | -25.2 | Pyridyl  |
| A0 | A93 | 1     | 1     | 2-x,-0.5+y,z    | 9.829    | -10.3   | -10.0        | -35.5      | 30.7      | -25.2 | Pyridyl  |
| A0 | A86 | 1     | 1     | 1-x,0.5+y,z     | 10.962   | -16.1   | -8.5         | -25.5      | 30.0      | -20.1 | Benzo    |
| A0 | A81 | 1     | 1     | 1-x,-0.5+y,z    | 10.962   | -16.1   | -8.5         | -25.5      | 30.0      | -20.1 | Benzo    |
| A0 | A31 | 1     | 1     | 1-x,1-y,-0.5+z  | 10.145   | -12.6   | -6.9         | -36.8      | 37.4      | -18.8 | Benzo    |
| A0 | A32 | 1     | 1     | 1-x,1-y,0.5+z   | 10.145   | -12.6   | -6.9         | -36.8      | 37.4      | -18.8 | Benzo    |
| A0 | A14 | 1     | 1     | x,y,-1+z        | 6.789    | -8.0    | -2.8         | -10.1      | 8.3       | -12.7 | In-layer |
| A0 | A15 | 1     | 1     | x,y,1+z         | 6.789    | -8.0    | -2.8         | -10.1      | 8.3       | -12.7 | In-layer |
| A0 | A69 | 1     | 1     | x,1.5-y,0.5+z   | 8.657    | 4.1     | -1.8         | -7.5       | 1.6       | -3.6  |          |
| A0 | A68 | 1     | 1     | x,1.5-y,-0.5+z  | 8.657    | 4.1     | -1.8         | -7.5       | 1.6       | -3.6  |          |
| A0 | A92 | 1     | 1     | 2-x,-0.5+y,-1+z | 11.946   | -1.8    | -0.2         | -0.8       | 0.0       | -2.8  |          |
| A0 | A99 | 1     | 1     | 2-x,0.5+y,1+z   | 11.946   | -1.8    | -0.2         | -0.8       | 0.0       | -2.8  |          |
| A0 | A87 | 1     | 1     | 1-x,0.5+y,1+z   | 12.894   | -1.1    | -0.1         | -0.5       | 0.0       | -1.7  |          |
| A0 | A80 | 1     | 1     | 1-x,-0.5+y,-1+z | 12.894   | -1.1    | -0.1         | -0.5       | 0.0       | -1.7  |          |
| A0 | A41 | 1     | 1     | 2-x,-y,0.5+z    | 12.766   | -0.6    | -0.1         | -1.0       | 0.0       | -1.6  |          |
| A0 | A40 | 1     | 1     | 2-x,-y,-0.5+z   | 12.766   | -0.6    | -0.1         | -1.0       | 0.0       | -1.6  |          |

Interaction energies with absolute value less than 1 kJ mol<sup>-1</sup> are not listed

$\alpha_2$ : BIYSEH05 (DFT-D optimised),  $P2_1/c$  ( $a = 17.4669$ ,  $b = 11.6561$ ,  $c = 6.7665$  Å,  $\beta = 98.721^\circ$ )

Estimated totals (kJ mol<sup>-1</sup>) from 12 most stabilising interactions: in-layer -52.7; pyridyl -57.1; benzo -39.9 (factor ½ applied to deal with “double counting”).

|    |     | Mol 1 | Mol 2 | Mol 2 Operator   | Distance | Coulomb | Polarisation | Dispersion | Repulsion | Total |          |
|----|-----|-------|-------|------------------|----------|---------|--------------|------------|-----------|-------|----------|
| A0 | A69 | 1     | 1     | 2-x,2-y,1-z      | 8.406    | -24.4   | -7.7         | -45.8      | 29.9      | -48.0 | Pyridyl  |
| A0 | A91 | 1     | 1     | x,2.5-y,-0.5+z   | 4.990    | -11.0   | -5.9         | -63.1      | 39.6      | -40.4 | In-layer |
| A0 | A92 | 1     | 1     | x,2.5-y,0.5+z    | 4.990    | -11.0   | -5.9         | -63.1      | 39.6      | -40.4 | In-layer |
| A0 | A46 | 1     | 1     | 2-x,0.5+y,0.5-z  | 9.927    | -12.9   | -8.9         | -33.8      | 27.2      | -28.3 | Pyridyl  |
| A0 | A41 | 1     | 1     | 2-x,-0.5+y,0.5-z | 9.927    | -12.9   | -8.9         | -33.8      | 27.2      | -28.3 | Pyridyl  |
| A0 | A57 | 1     | 1     | 1-x,2-y,1-z      | 10.634   | -16.3   | -3.7         | -24.2      | 16.0      | -28.2 | Benzo    |
| A0 | A28 | 1     | 1     | 1-x,-0.5+y,0.5-z | 11.093   | -13.1   | -7.7         | -22.4      | 25.0      | -18.3 | Benzo    |
| A0 | A33 | 1     | 1     | 1-x,0.5+y,0.5-z  | 11.093   | -13.1   | -7.7         | -22.4      | 25.0      | -18.3 | Benzo    |
| A0 | A56 | 1     | 1     | 1-x,2-y,-z       | 9.865    | -8.5    | -6.1         | -45.2      | 44.8      | -15.0 | Benzo    |
| A0 | A14 | 1     | 1     | x,y,-1+z         | 6.766    | -8.3    | -3.0         | -10.3      | 9.3       | -12.3 | In-layer |
| A0 | A15 | 1     | 1     | x,y,1+z          | 6.767    | -8.3    | -3.0         | -10.3      | 9.3       | -12.3 | In-layer |
| A0 | A68 | 1     | 1     | 2-x,2-y,-z       | 9.525    | -0.1    | -3.8         | -23.4      | 17.7      | -9.6  | Pyridyl  |
|    |     |       |       |                  |          |         |              |            |           |       |          |
| A0 | A85 | 1     | 1     | x,1.5-y,-0.5+z   | 8.675    | 3.8     | -1.8         | -7.2       | 1.8       | -3.5  |          |
| A0 | A86 | 1     | 1     | x,1.5-y,0.5+z    | 8.675    | 3.8     | -1.8         | -7.2       | 1.7       | -3.5  |          |
| A0 | A42 | 1     | 1     | 2-x,-0.5+y,1.5-z | 11.147   | -1.5    | -0.2         | -0.9       | 0.0       | -2.7  |          |
| A0 | A47 | 1     | 1     | 2-x,0.5+y,1.5-z  | 11.147   | -1.5    | -0.2         | -0.9       | 0.0       | -2.7  |          |
| A0 | A74 | 1     | 1     | 2-x,3-y,1-z      | 12.497   | -1.7    | -0.1         | -0.9       | 0.0       | -2.7  |          |
| A0 | A34 | 1     | 1     | 1-x,0.5+y,1.5-z  | 13.587   | -1.6    | -0.1         | -0.3       | 0.0       | -2.0  |          |
| A0 | A29 | 1     | 1     | 1-x,-0.5+y,1.5-z | 13.587   | -1.6    | -0.1         | -0.3       | 0.0       | -2.0  |          |
| A0 | A73 | 1     | 1     | 2-x,3-y,-z       | 13.275   | -0.5    | 0.0          | -0.8       | 0.0       | -1.3  |          |
| A0 | A58 | 1     | 1     | 1-x,2-y,2-z      | 14.847   | -0.8    | 0.0          | -0.1       | 0.0       | -1.0  |          |

Interaction energies with absolute value less than 1 kJ mol<sup>-1</sup> are not listed
